# Supplementary material for: Photovoltaic performance of novel push–pull–push thienyl–Bodipy dyes in solution-processed BHJ-solar cells
Source: Royal Society of Chemistry journal article supplement (doi:10.1039/c3nj01436c), 2014-01-01
Supplement: c3nj01436c1.pdf [file c3nj01436c1.pdf]

## Photovoltaic Performance of Novel Push-Pull-Push Thienyl-Bodipy Dyes in Solution-processed BHJ-Solar Cells

Alexandra Sutter, Pascal Retailleau, Wei-Ching Huang, Hao-Wu Lin,  
and Raymond Ziessel

### Supporting Information

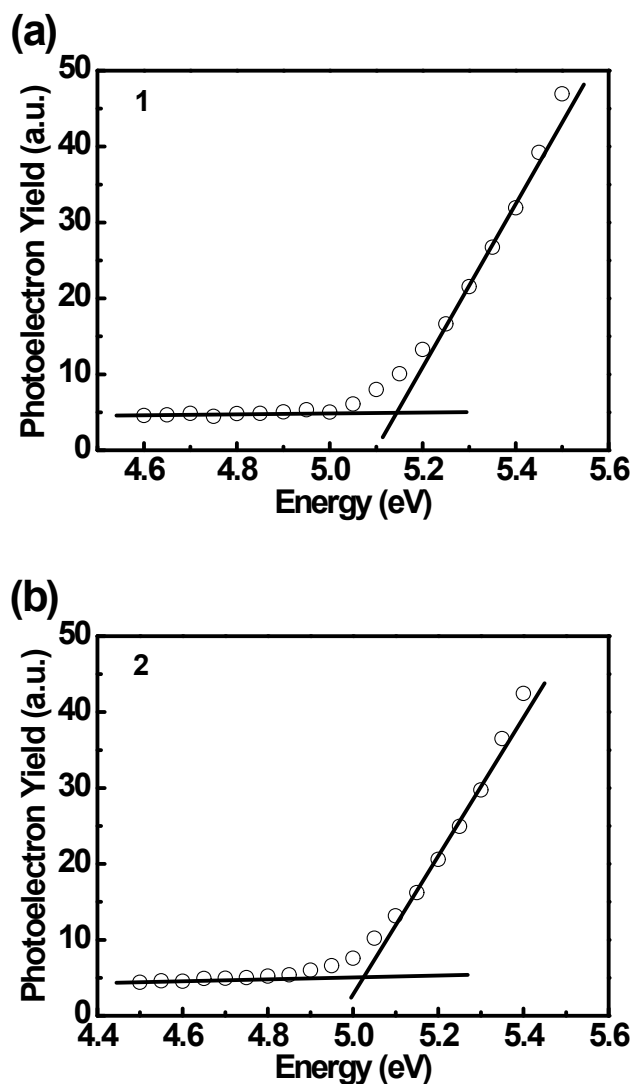

Figure S1. Photoelectron spectra of (a) compound 1 and (b) compound 2 thin films.

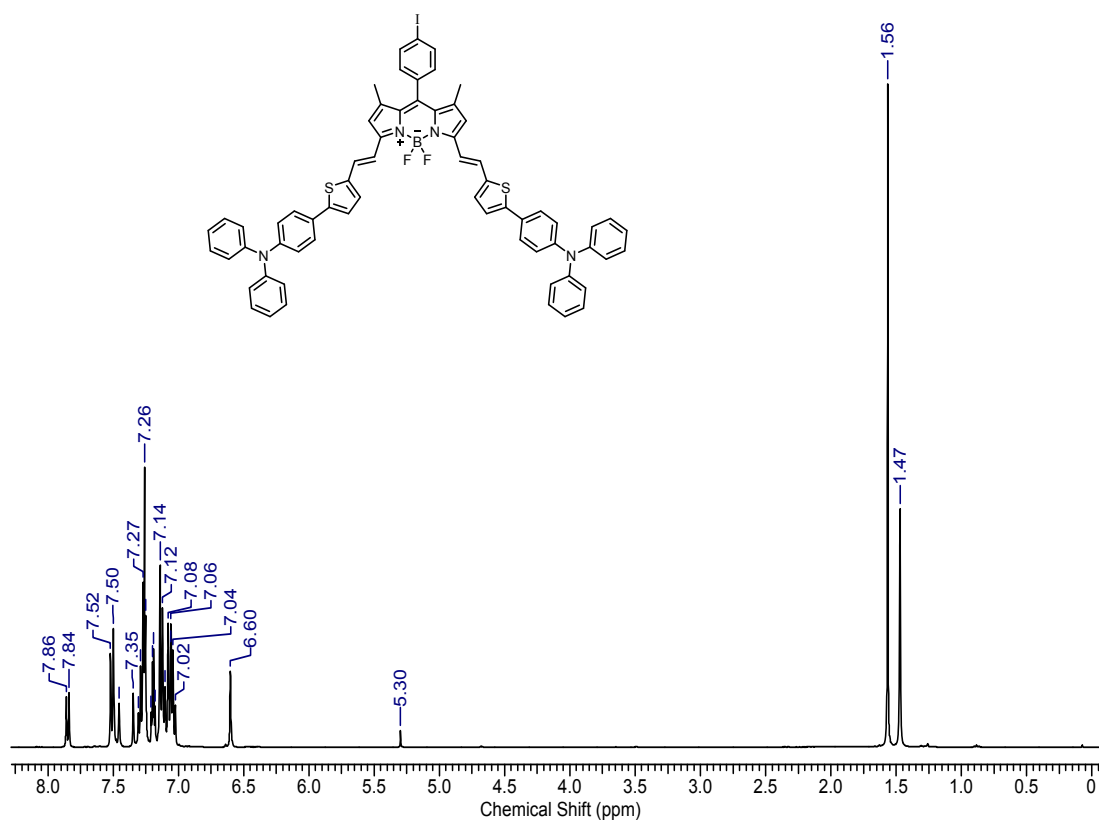

Figure S2. Proton NMR of compound 1.

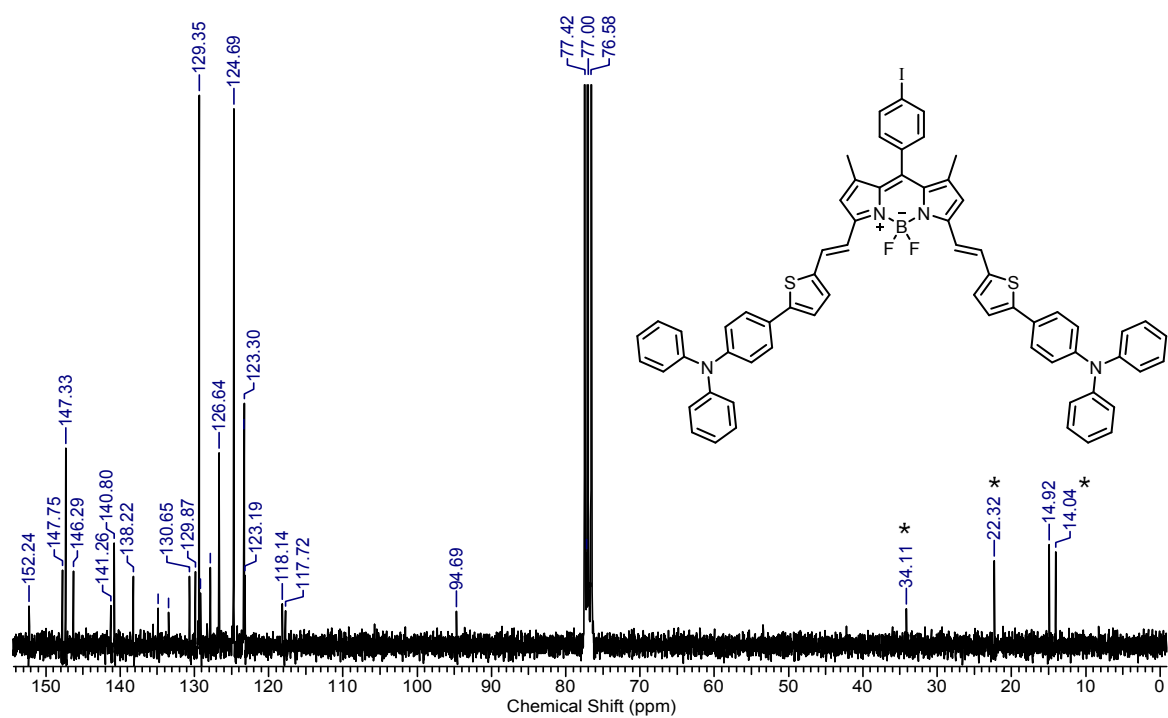

Figure S3. Carbon NMR of compound 1. \* accounts for *n*-pentane.

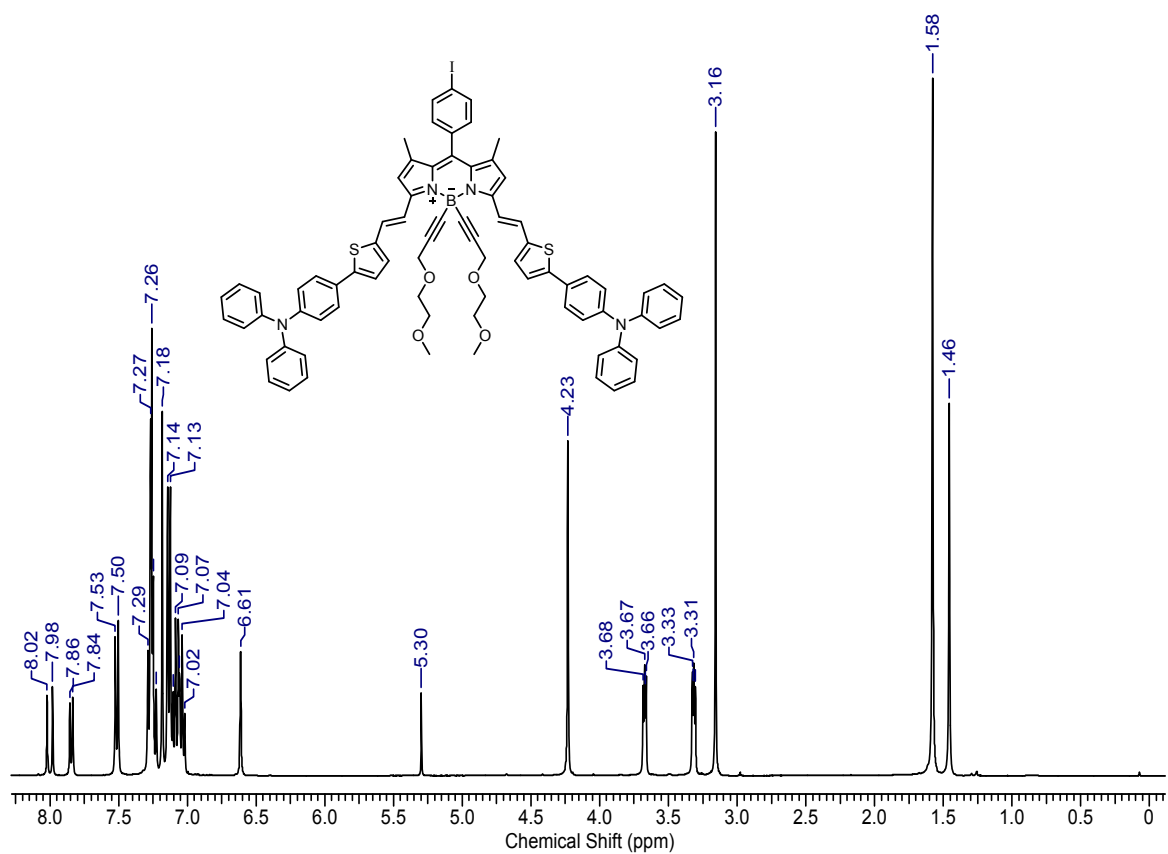

Figure S4. Proton NMR of compound 2.

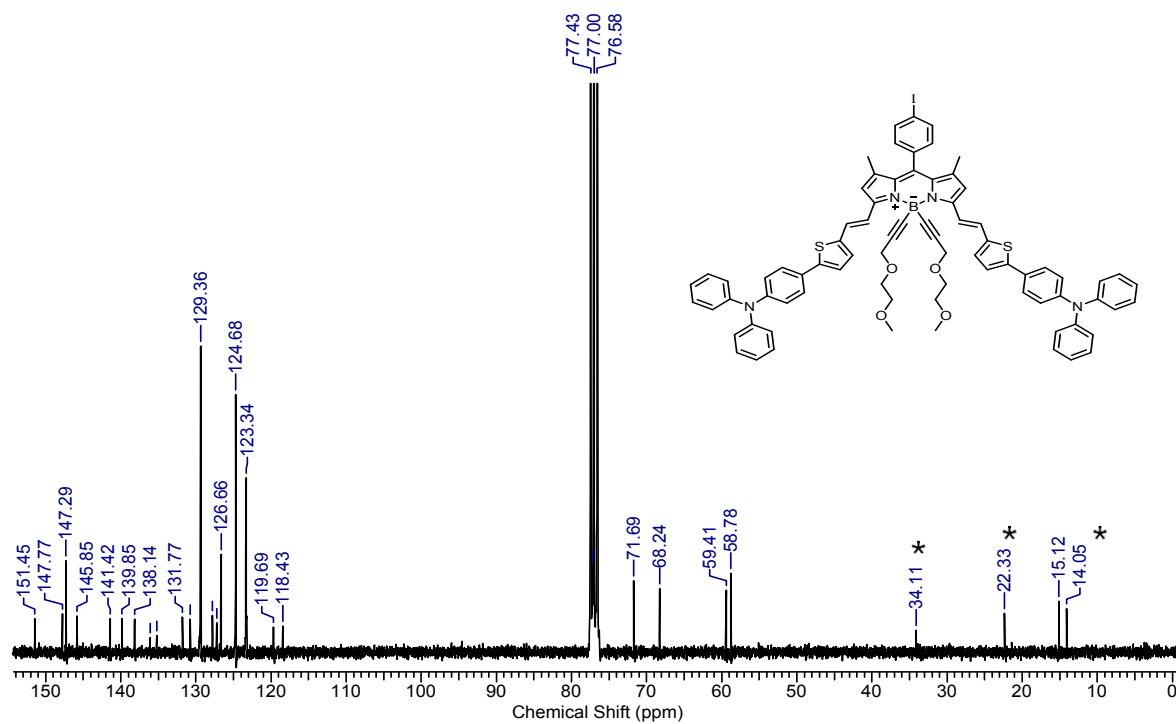

Figure S5. Carbon NMR of compound 2. \* accounts for *n*-pentane.
